# Supplementary material for: Domain-General Cognitive Skills in Children with Mathematical Difficulties and Dyscalculia: A Systematic Review of the Literature
Source: MDPI journal article supplement (doi:10.3390/brainsci12020239), 2022-02-10
Supplement: s1 [file s1]

**Table S1.** Tools, domains, and criteria used to define the group with MD in included studies.

| Math Achievement Test    | Domains                                                                                                                              | Criteria for MD                             | Study                                   |
|--------------------------|--------------------------------------------------------------------------------------------------------------------------------------|---------------------------------------------|-----------------------------------------|
| AC-MT <sup>i</sup> 11-14 | Written calculation (+; -; x; : ); number knowledge (number magnitude; numerical syntax comprehension)                               | < 25°                                       | Passolunghi., 2011                      |
|                          |                                                                                                                                      | < 10°                                       | Mammarella et al., 2018 <sup>b</sup>    |
| AC-FL <sup>ii</sup>      | Math Fluency (+; -; x)                                                                                                               | <10°                                        | Mammarella et al., 2018 <sup>b</sup>    |
| DEMAT <sup>iii</sup>     | arithmetic, geometry, numerical sizes                                                                                                | < 25°                                       | Lambert & Spinath, 2018                 |
| IDS <sup>iv</sup>        | Arithmetical skills (counting; ordinal number; magnitude; invariance; knowledge of Arabic numbers; one step arithmetic word problem) | < 15°                                       | Reimman et al., 2013                    |
| KTR-R <sup>v</sup>       | Mental arithmetic + number knowledge                                                                                                 | < 10°                                       | De Weerdts et al., 2012a <sup>b</sup>   |
|                          |                                                                                                                                      | < 10°                                       | De Weerdts et al., 2012b <sup>b</sup>   |
| MaLT <sup>vi</sup>       | All area of math curriculum                                                                                                          | < 16°                                       | Szucs et al., 2013 <sup>a</sup>         |
| TEMA-2 <sup>vii</sup>    | Quantities; Counting; comparison; informal arithmetic                                                                                | < 10° in at least three assessment          | Mazzocco & Kover, 2007                  |
|                          |                                                                                                                                      | < 25° (or < 10°) in at least two assessment | Murphy et al., 2007                     |
|                          |                                                                                                                                      | < 25° at both preschool years               | Chu et al., 2019 <sup>a</sup>           |
| TDE <sup>viii</sup>      | Arithmetic subtest: simple word problems and computational skills (+; -; x; : )                                                      | -1 sd                                       | Costa et al., 2011                      |
|                          |                                                                                                                                      | < 25°                                       | Moura et al., 2013                      |
| TTR <sup>ix</sup>        | Arithmetic number facts problems (+; -; x; : and mixed)                                                                              | < 10°                                       | De Weerdts et al., 2013a <sup>b</sup> ; |
|                          |                                                                                                                                      | < 10°                                       | De Weerdts et al., 2013b <sup>b</sup> ; |
|                          |                                                                                                                                      | 1 year delayed                              | Attout & Maierius, 2015 <sup>c</sup>    |
|                          |                                                                                                                                      | - 1 sd                                      | Donker et al., 2016 <sup>a</sup>        |
|                          |                                                                                                                                      | -1 sd                                       | Slot et al., 2016 <sup>a</sup>          |
| WIAT <sup>x</sup>        | Mathematics reasoning- basic arithmetic skills (counting; subtraction; reading numbers; time telling)                                | < 30°                                       | Geary et al., 1999                      |
|                          |                                                                                                                                      | < 30°                                       | Geary et al., 2004                      |
|                          |                                                                                                                                      | < 25° on 1 <sup>st</sup> grade              | Chu et al., 2019 <sup>a</sup>           |
|                          |                                                                                                                                      | < 35° in all assessment                     | Geary et al., 2000                      |

|                              |                                                                                                                                                                                          |                          |                                            |
|------------------------------|------------------------------------------------------------------------------------------------------------------------------------------------------------------------------------------|--------------------------|--------------------------------------------|
|                              |                                                                                                                                                                                          | < 15° in all assessment  | Geary et al., 2007                         |
|                              |                                                                                                                                                                                          | < 11° in all assessment  | Geary et al., 2008                         |
|                              |                                                                                                                                                                                          | < 11° in all assessment  | Cowan & Powell, 2014 (+ fluency task)      |
|                              | Numerical Operations Subtest (counting; reading numbers; written calculation for +; -; x; : )                                                                                            | < 16°                    | Szucs et al., 2013 <sup>a</sup>            |
|                              |                                                                                                                                                                                          | < 25°                    | McDonald & Berg, 2018                      |
| WJ-III <sup>xi</sup>         | Calculation subtest                                                                                                                                                                      | < 15°                    | Fuchs et al., 2008 (+ not validated tests) |
|                              |                                                                                                                                                                                          | < 25°                    | Keeler & Swanson                           |
|                              |                                                                                                                                                                                          | < 11° in half assessment | Mazzocco & Grimm, 2013                     |
| WRAT <sup>xii</sup>          | Computational skills (+; -; x; : )                                                                                                                                                       | < 25°                    | Keeler & Swanson, 2001                     |
|                              |                                                                                                                                                                                          | < 25°                    | Peng et al., 2012 <sup>a</sup>             |
|                              |                                                                                                                                                                                          | <30° in both years       | Passolunghi & Siegel, 2004 <sup>a</sup>    |
|                              | Identification of numbers; counting; number comparison; computational skills (+; -; x; : )<br>Identification of numbers; counting; number comparison; computational skills (+; -; x; : ) | < 16°                    | Raghubar et al., 2009                      |
|                              |                                                                                                                                                                                          | <30°                     | Cirino et al., 2007                        |
|                              |                                                                                                                                                                                          | <25°                     | Cirino et al., 2015                        |
|                              |                                                                                                                                                                                          | -1 or 1.5 sd<br>- 2 sd   | Webster, 1980                              |
| ZAREKI-R <sup>xiii</sup>     | Number processing (counting; transcoding; comparison); and calculation (mental; problem solving)                                                                                         | Raw score<br>< 80        | Kuhn et al., 2016                          |
|                              |                                                                                                                                                                                          | - 1.5 sd                 | Lafay et al., 2017                         |
| Local math standardized test | Standardized Math Test (Amoretti et al., 1994)                                                                                                                                           | < 25°                    | Passolunghi & Mammarella, 2012             |
|                              |                                                                                                                                                                                          | < 30° in all assessment  | Passolunghi & Siegel, 2004 <sup>a</sup>    |
|                              | Standardized math test (Dong, 2011)<br>number; algebra; space and geometry; statistics and probability (+ < 20° on the last three academic exams)                                        | < 20°                    | Cai et al., 2013                           |
|                              | Standardized pedagogic task (Simonart,1998)-<br>Computational skills (+; - ; x; : )                                                                                                      | 2 years of delay         | Censabella & Noel, 2007 (study #1)         |

|                      |                                                                                                                                                                          |                                                                                           |                                             |
|----------------------|--------------------------------------------------------------------------------------------------------------------------------------------------------------------------|-------------------------------------------------------------------------------------------|---------------------------------------------|
|                      | Cito Math test (Math problem solving; Janssen et al., 2010)                                                                                                              | < 15°                                                                                     | Kroesbergen & Van Dijk, 2015                |
|                      |                                                                                                                                                                          | < 25°                                                                                     | Donker et al., 2016 <sup>a</sup>            |
|                      |                                                                                                                                                                          | < 25°                                                                                     | Slot et al., 2016 <sup>a</sup>              |
|                      | Swedish National Agency for Education (arithmetic; measurement; geometry; fractions; algebra; probability and statics)                                                   | Grade E                                                                                   | Träff et al., 2020                          |
|                      | LAMK <sup>xiv</sup>                                                                                                                                                      | < 25°                                                                                     | Wong & Chan, 2019                           |
|                      |                                                                                                                                                                          | < 25° in both assessment                                                                  | Chan & Wong, 2019                           |
| Math Problem Solving | Adapted from <i>Arithmetical Reasoning</i> subtest (WISC-IV)                                                                                                             | < 15°                                                                                     | Peng et al., 2012 <sup>a</sup>              |
| Composite score      | Tedi-Math <sup>xv</sup> (writing numbers and comparison) + computational skills ( <i>ad hoc</i> )                                                                        | < 15°                                                                                     | Rousselle & Noël, 2007                      |
|                      | PIAT <sup>xvi</sup> + WRAT-R                                                                                                                                             | -1.25 sd                                                                                  | Willcutt et al., 2013                       |
|                      | Hong Kong Attainment test on Mathematics (arithmetic; measure; shape and space; data handling) + computational skills (+; -; ×); Number sense; Number facts; place value | < 25° in 2 <sup>nd</sup> grade<br><br>< 20° in 3 <sup>rd</sup> and 4 <sup>th</sup> grades | Chan & Ho, 2010                             |
| Growth curve         |                                                                                                                                                                          | WIAT                                                                                      | Geary et al., 2012a;<br>Geary et al., 2012b |
|                      |                                                                                                                                                                          | BAT <sup>xvii</sup>                                                                       | Zhang et al., 2020                          |

<sup>a</sup>MD group defined by scores under cut-off on both test

<sup>b</sup>MD group defined by scores under cut-off on at least one test

<sup>c</sup>MD group defined by both one-year delay at TTR and scores below 2 sd on at least two subtests of standardized arithmetical tests (ZAKERI-R; Tedi-Math; Numerical)

<sup>i</sup>AC-MT= Assessment of Arithmetic Calculation (Test di valutazione delle Abilità di Calcolo- gruppo MT). *Cornoldi et al., 2002*

<sup>ii</sup> AC-FL. Nuove prove di fluenza matematica (Mathematics Fluency). *Caviola et al., 2016*

<sup>iii</sup> DEMAT= Deutscher Mathematiktest [German Test for mathematical achievement]. *Krajewski et al., 2004*

<sup>iv</sup> IDS= Intelligence and Development Scales. *Grob et al., 2009*

<sup>v</sup> KRT-R= Kortrijkse Rekenentest Revisie (Kortrijk Arithmetic test Revision). *Baudonck et al., 2006*

<sup>vi</sup> MaLT= Mathematics Assessment for Learning and Teaching test. *Williams, 2005*

<sup>vii</sup> TEMA= Test of Early Mathematics Ability.

<sup>viii</sup> TDE= Teste de Desempenho Escolar. *Stein, 1994*

<sup>ix</sup> TTR= Tempo Test Rekenen (Tempo Test Arithmetic). *De Vos, 1992*

<sup>x</sup> WIAT= Weschler Individual Achievement Test (Mathematics Reasoning subtest). *Weschler, 1992*

<sup>xi</sup> WJ -III= Woodcock-Johnson Test of Achievement

<sup>xii</sup> WRAT= Wide Range Achievement Test

<sup>xiii</sup> ZAREKI-R= Neuropsychologische Testbatterie für Zahlenverarbeitung und Rechnen bei Kindern – Revidierte Fassung. *Von Aster et al., 2006*

<sup>xiv</sup> LAMK: Learning and achievement Mathematical Kit. *Hong Kong Education Bureau, 2015*

<sup>xv</sup> Tedi Math= Test Diagnostique des Compétences de Base en Mathématiques. *Van Nieuwenhoven et al., 2001*

<sup>xvi</sup> PIAT= Peabody Individual Achievement Test.

<sup>xvii</sup> BAT= Basic Arithmetic Test. *Räsänen & Aunola, 2007*
